# Supplementary material for: Interferon-independent STING signaling promotes resistance to HSV-1 in vivo
Source: Nat Commun. 2020 Jul 7;11:3382. doi: 10.1038/s41467-020-17156-x (PMC7341812; doi:10.1038/s41467-020-17156-x)
Supplement: Supplementary file 2 — Supplementary Information [file 41467_2020_17156_MOESM2_ESM.pdf]

## **Supplementary information**

Interferon-independent STING signaling promotes HSV-1 resistance *in vivo*

Yamashiro et al.

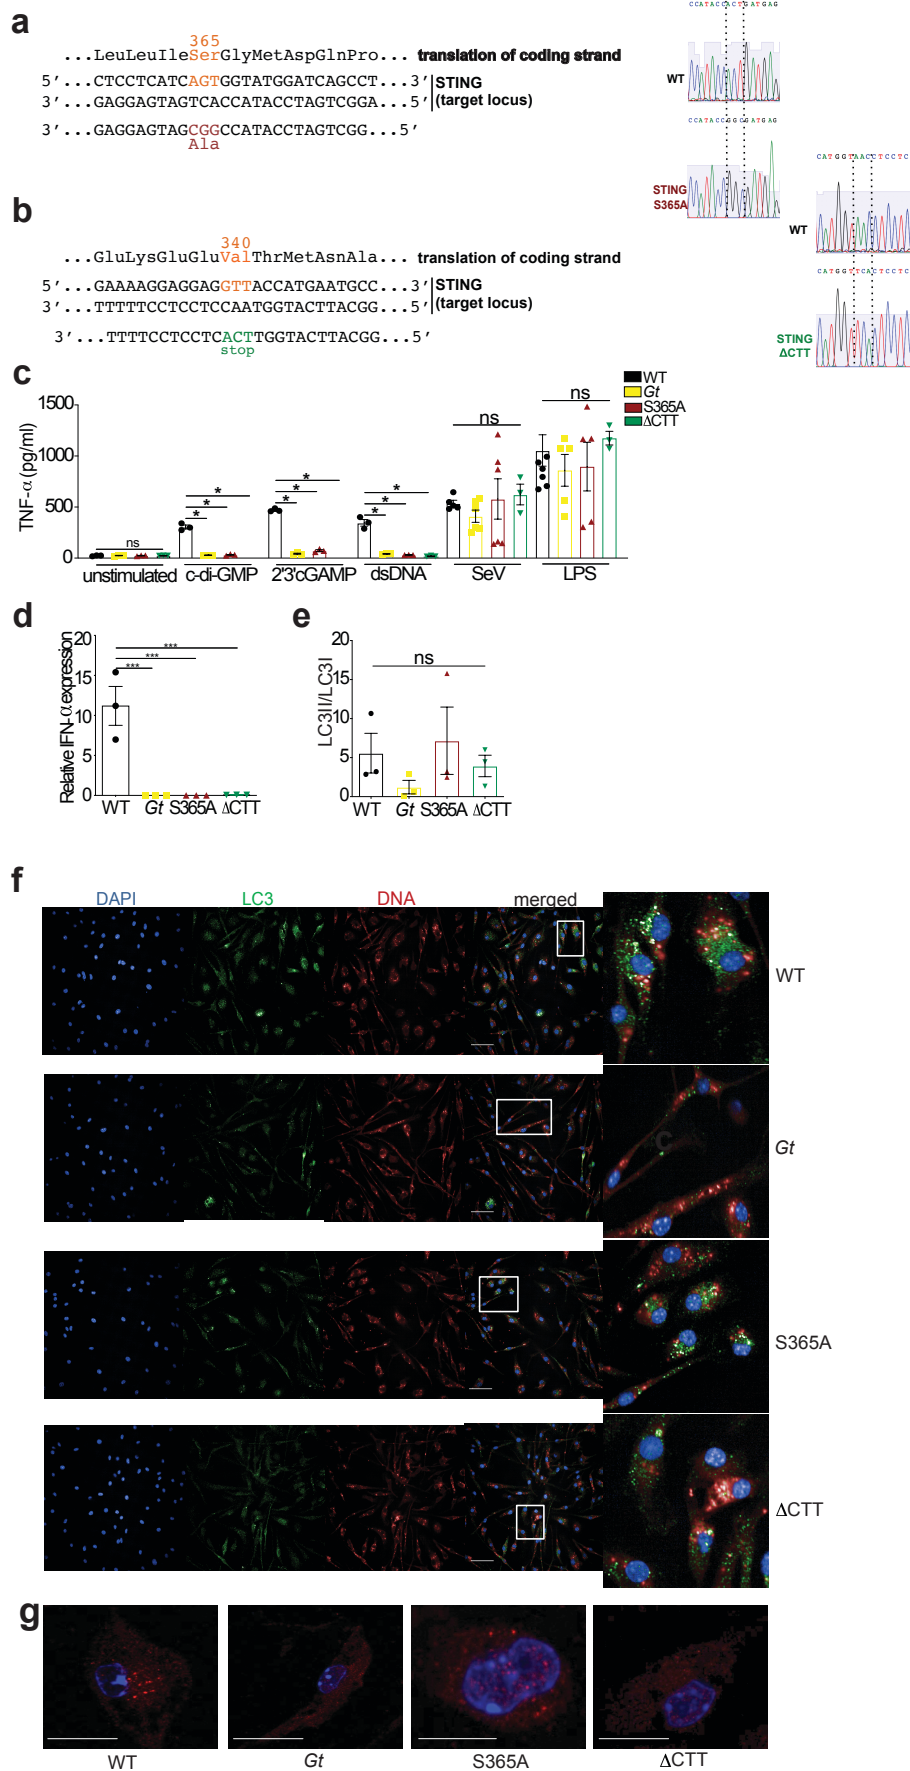

**Supplementary Fig. 1.** (related to figure 1). **a**, Creation of STING S365A and **b**,  $\Delta$ CTT mice using CRISPR/Cas9. **c**, Bone marrow derived macrophages (BMM) were stimulated for 6h and TNF- $\alpha$  was measured on the supernatant. **d**, Primary macrophages were transfected with 2'3'cGAMP for 4h and relative expression of *Ifna* was analyzed. **e**, Quantification of LC3II/LC3I ratio from three independent experiments similar to Fig.1d. **f**, Colocalization of DNA and LC3 is increased in WT and S365A cells. Fluorescence images of primary macrophages transfected for 6h with Cy3-labeled DNA and LC3. Images were analyzed by an automated pipeline created on Perkin Elmer Harmony software for colocalization quantification (for more details refer to Methods). Scale bars are 50  $\mu$ m. **g**, BMM were transfected with 2'3'cGAMP for 4h and STING puncta formation (in red) was visualized. Scale bars are 10  $\mu$ m. Images were taken using a Carl Zeiss LSM710 confocal microscope. Representative results of three independent experiments, each yielding similar results. Center and error bars show mean and SEM. Analyzed with one-way ANOVA and Tukey post-test. \*,  $p \leq 0.05$ . ns, not significant. Exact p-values were provided in the Supplementary information.

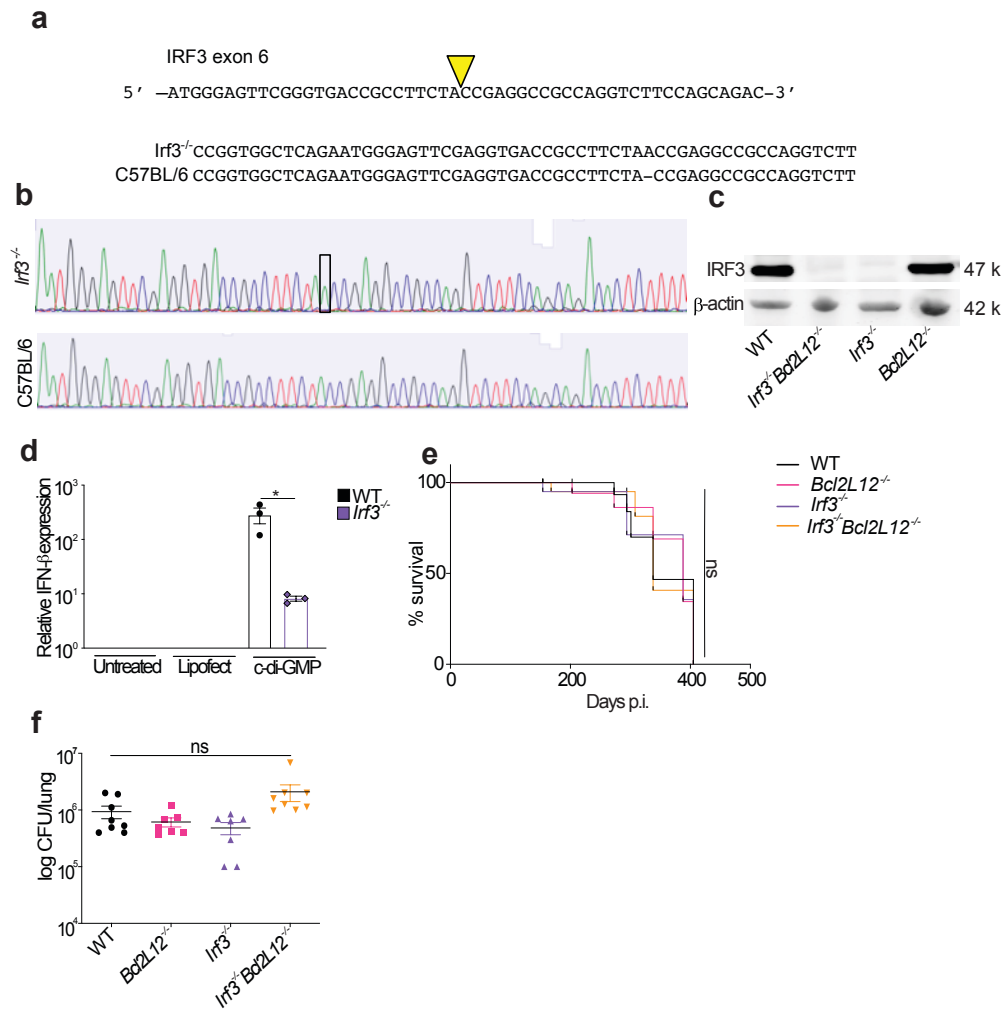

**Supplementary Fig. 2.** (related to figure 2). Creation of IRF3 deficient mice using CRISPR/Cas9. **a**, CRISPR/Cas9 targeting strategy for IRF3. **b**, Sequencing of the targeted locus resulting in *Ir3*<sup>-/-</sup> mutation. **c**, Immunoblot of MEFs for IRF3. Representative results of two independent experiments **d**, Primary macrophages were transfected with c-di-GMP for 6h and relative expression of *Ifnb* was analyzed. **e**, Mice were aerosol infected with 400 CFU dose of *M. tuberculosis* (Erdman strain). Survival of infected mice. (n=12 mice per genotype) **f**, Bacterial burden from lungs at 21 days post-infection. n=4 mice per genotype. Combined two independent experiments. All mice except C57BL/6J WT were bred in-house. Four independent experiments were performed, each yielding similar results. Center and error bars show mean and SEM. Analyzed with one-way ANOVA and Tukey post-test. \*, p ≤ 0.05. ns, not significant. Exact p-values were provided in the Supplementary Information.

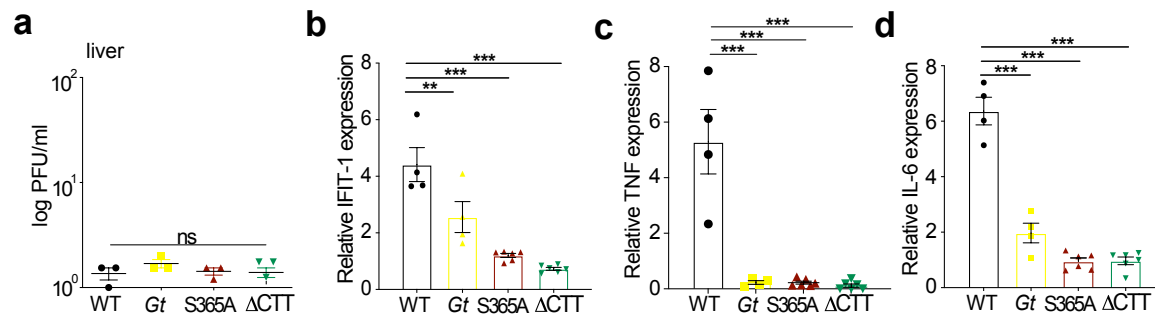

**Supplementary Fig. 3.** (related to figure 3). Mice were intravenously infected with  $1 \times 10^6$  PFU of HSV-1 (KOS strain). **a**, Viral titers in the liver at 6 days p.i. **b**, Relative expression of *Ifit1* **c**, *Tnf* and **d**, *Il6* from brains at 3 days p.i. All mice except C57BL/6J WT were bred in-house. **(a)**  $n=3/3/3/3$ , **(b-d)**  $n=4/4/6/6$ . Representative results of five independent experiments, each yielding similar results. Center and error bars show mean and SEM. Analyzed with one-way ANOVA and Tukey post-test. \*\*,  $p \leq 0.005$ ; \*\*\*,  $p \leq 0.0001$ . ns, not significant. Exact p-values were provided in the Supplementary Information.

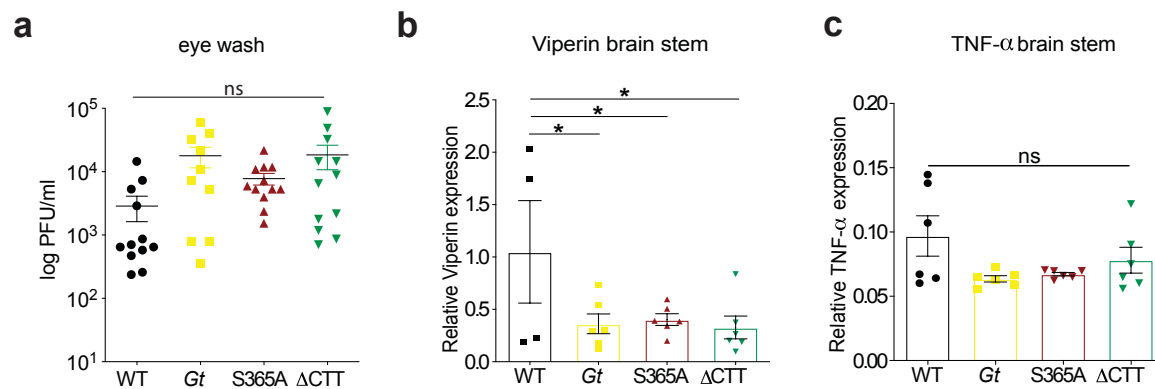

**Supplementary Fig. 4.** (related to figure 4). Mice were ocular infected with  $1 \times 10^5$  PFU of HSV-1 (strain 17). **a**, Viral titers from eyes washed at 2 days p.i. Combined three independent experiments, each yielding similar results. **b**, Relative expression of *viperin* and **c**, *Tnf $\alpha$* . All mice except C57BL/6J WT were bred in-house. **(b)**  $n=4/6/6/6$ , **(c)**  $n=6/6/6/6$ . Representative results of three independent experiments, each yielding similar results. Center and error bars show mean and SEM. Analyzed with one-way ANOVA and Tukey post-test. \*,  $p \leq 0.05$ . ns, not significant. Exact p-values were provided in the Supplementary Information.

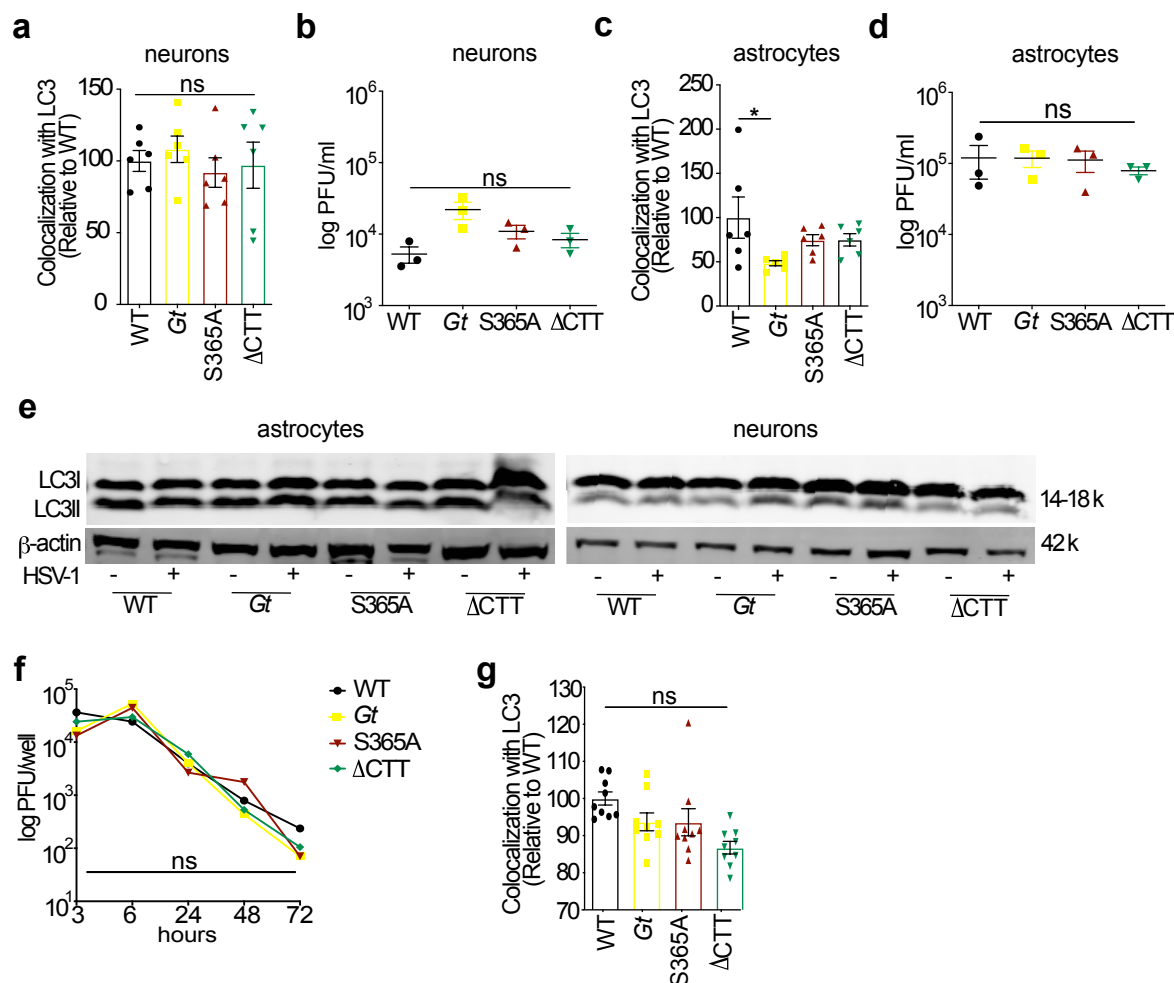

**Supplementary Fig. 5.** (related to figure 4). Brain cells (neurons and astrocytes) were harvested from P0 pups and infected with HSV-1 (KOS strain) at a MOI 1 for 6h and later were stained for LC3 and HSV-1. **a**, Quantification of colocalization of LC3-HSV-1 in neurons was performed and **b**, Viral titers from supernatants were collected 48h later and quantified by TCID50 assay. **c-d**, Same as a-b, in astrocytes. **e**, Cell lysates were collected at 4h post-infection and immunoblot for LC3 and β-actin was performed. **f**, Bone marrow-derived macrophages were infected with HSV-1 (KOS strain) at MOI of 1 and viral titers were quantified at indicated time points. **g**, Quantification of colocalization of LC3-HSV-1 in bone marrow-derived macrophages was performed. (**b** and **d**)  $n=3/3/3/3$ . (**a-g**) Representative results from two independent experiments, each yielding similar results. Center and error bars show mean and SEM. Analyzed with one-way ANOVA and Tukey post-test. \*,  $p \leq 0.05$ . ns, not significant. Exact p-values were provided in the Supplemental Information.

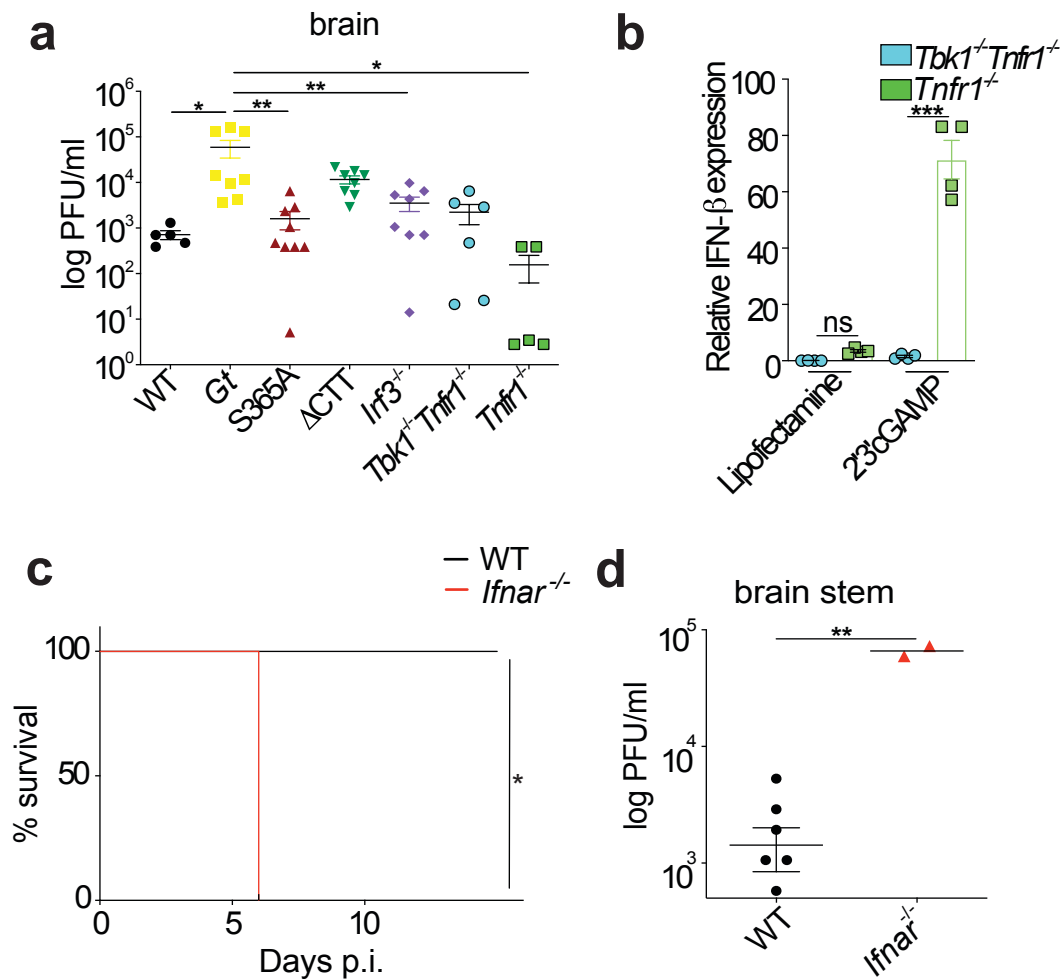

**Supplementary Fig. 6.** (related to figure 5). **a**, Mice were ocular infected with  $1 \times 10^5$  PFU of HSV-1 (strain 17) and viral titers measured in the brain 6 days p.i. **b**, BMDMs were transfected with 2'3'cGAMP for 6h and relative expression of *Irfnb* was analyzed. **c**, Mice were ocular infected with  $1 \times 10^5$  PFU of HSV-1 (strain 17) and survival rate and **d**, viral titers measured in the brain stem 6 days p.i. All mice except C57BL/6J WT were bred in-house. **(a)**  $n=3/5$  mice per genotype. Combined results from two independent experiments, each yielding similar results. **(c-d)**  $n=6/2$ . Representative results of two independent experiments, each yielding similar results. Center and error bars show mean and SEM. Analyzed with one-way ANOVA and Tukey post-test. \*,  $p \leq 0.05$ ; \*\*,  $p \leq 0.005$ . ns, not significant. Exact p-values were provided in the Supplemental Information.

**Figure 1c**

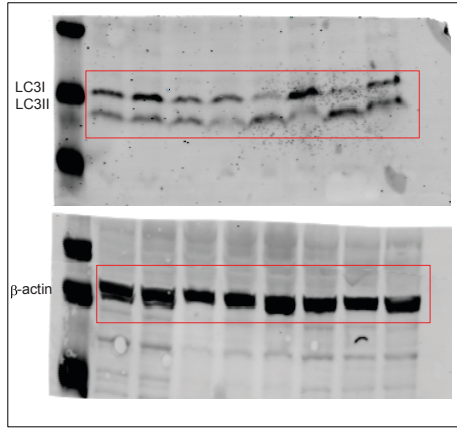

**Supplemental Figure 2c**

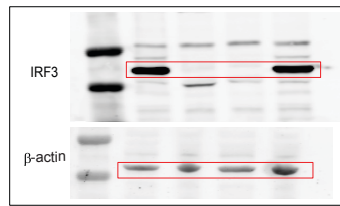

**Supplemental Figure 5e**

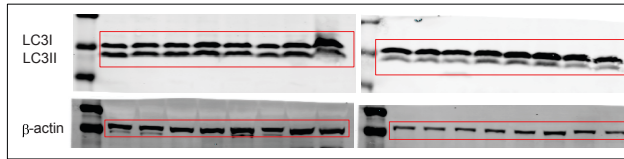

**Figure 1d**

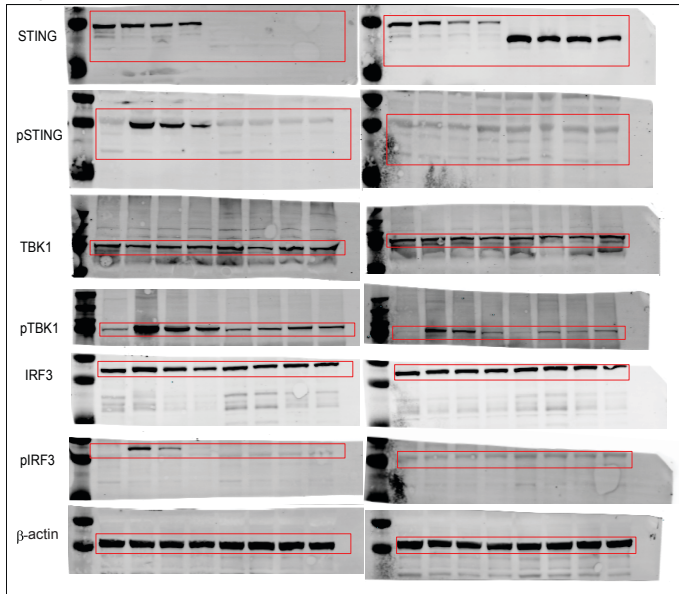

**Supplementary Fig 7.** Full blots of corresponding figures.

**a****Gating strategy for Figure 2g-i (CBA)**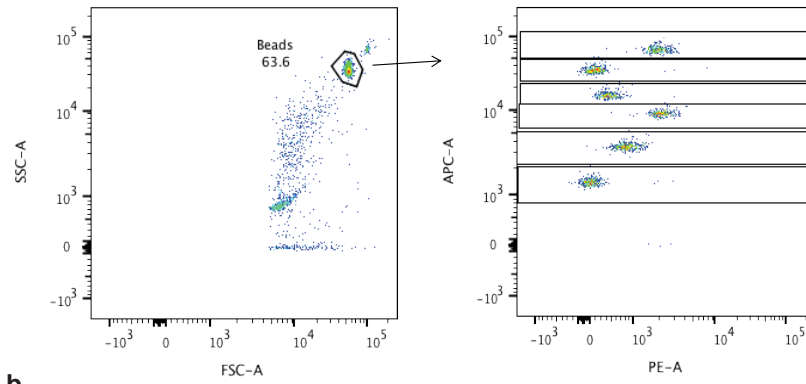**b****Gating strategy for Figure 4g-i (sorted brain cells)**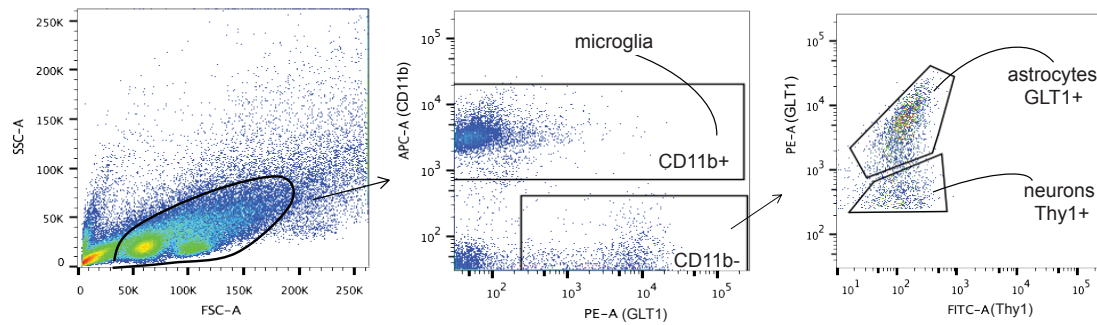

**Supplementary Fig 8. Gating strategies.** **a, Gating strategy for CBA analysis.** Beads are selected and analyzed according to APC versus PE staining. Each of the 6 clusters evidenced by APC staining corresponds to one cytokine. Median of intensity of PE staining is plotted to its correspondent standard curve for concentration levels. **b, Gating strategy for sorting of brain cells.** Brains from HSV-1 ocular infected mice were collected on day 3 p.i. and sorted as shown. n=3 mice per genotype. Representative results of three independent experiments, each yielding similar results.

|            |         |          |         |          |          |          |         |          |         |          |         |          |          |          |                    |             |                    |
|------------|---------|----------|---------|----------|----------|----------|---------|----------|---------|----------|---------|----------|----------|----------|--------------------|-------------|--------------------|
| Figure 1   |         |          |         | Figure 3 |          |          |         | Figure 4 |         |          |         | Figure 5 |          |          |                    |             |                    |
| 1a         | WT-Gt   | WT-S365A | WT-ΔCTT | 3a       | WT-Gt    | WT-ΔCTT  |         | 4a       | WT-Gt   | WT-S365A | WT-ΔCTT | 5a       | WT-Gt    | WT-S365A | WT-ΔCTT            | WT-Irf3-/-  | WT-Tbk1-/-Tnfr1-/- |
| c-di-GMP   | 0.01336 | 0.00848  | 0.00848 | day 5    | < 0.01   | < 0.001  |         | day 6    | < 0.001 |          |         | day 5    | < 0.05   |          |                    |             |                    |
| 2'3' cGAMP | 0.0719  | 0.0719   | 0.0719  | day 6    | < 0.001  | < 0.001  |         | day 7    |         | < 0.001  | < 0.01  | day 6    |          |          | < 0.01             | < 0.01      | < 0.05             |
| dsDNA      | 0.0208  | 0.0208   | 0.0208  | day 7    | < 0.001  | < 0.001  |         | day 8    |         | < 0.001  | < 0.01  | day 7    |          | < 0.01   | < 0.001            | < 0.001     |                    |
|            |         |          |         | day 8    | < 0.001  | < 0.001  |         | day 9    |         | < 0.001  |         | day 8    |          | < 0.001  |                    | < 0.001     |                    |
| 1b         | WT-Gt   | WT-S365A | WT-ΔCTT | 3b       | WT-Gt    | WT-ΔCTT  |         | 4b       | WT-Gt   | WT-S365A | WT-ΔCTT | day 9    |          | < 0.01   |                    |             |                    |
|            | 0.006   | 0.0227   | 0.006   | day 5    | < 0.05   | < 0.001  |         |          | 0.0082  | 0.0486   | 0.0016  | day 11   |          | < 0.01   |                    |             |                    |
| 1f         | WT-Gt   | WT-ΔCTT  |         | day 6    | < 0.001  | < 0.001  |         | 4c       | WT-Gt   | WT-ΔCTT  |         | day 12   |          | < 0.01   |                    |             |                    |
|            | <0.0001 | 0.0006   |         |          |          |          |         |          | 0.0011  | 0.0467   |         |          |          |          |                    |             |                    |
| 1g         | WT-Gt   | WT-ΔCTT  |         | 3c       | WT-Gt    | WT-ΔCTT  |         | 4d       | WT-Gt   | WT-ΔCTT  |         | 5b       | WT-Gt    | WT-ΔCTT  | WT-Tbk1-/-Tnfr1-/- |             |                    |
|            | <0.0001 | <0.0001  |         | 0.0253   | 0.0253   |          |         |          | 0.0011  | 0.0467   |         | 0.0027   | 0.0047   | 0.0027   |                    |             |                    |
| 1h         | WT-Gt   | WT-ΔCTT  |         | 3d       | WT-Gt    | WT-ΔCTT  |         | 4e       | WT-Gt   | WT-ΔCTT  |         | 5c       | WT-Gt    | WT-ΔCTT  | WT-Tbk1-/-Tnfr1-/- |             |                    |
|            | <0.0001 | 0.0002   |         | 0.0459   | 0.0275   |          |         |          | 0.0059  | 0.049    |         | 0.0012   | 0.049    | 0.049    |                    |             |                    |
|            |         |          |         | 3e       | WT-Gt    |          |         | 4f       | WT-Gt   | WT-S365A | WT-ΔCTT | 5d       | WT-Gt    | WT-S365A | WT-ΔCTT            | WT-Irf3-/-  | WT-Tbk1-/-Tnfr1-/- |
|            |         |          |         | 0.0095   |          |          |         |          | 0.041   | 0.046    | 0.048   | < 0.0001 | < 0.0001 | < 0.0001 | 0.0023             | < 0.0001    | WT-Tnfr1-/-        |
| Suppl 1    |         |          |         | 3f       | WT-Gt    | WT-S365A | WT-ΔCTT | 4g       | WT-Gt   | WT-S365A | WT-ΔCTT |          |          |          |                    |             | 0.002              |
| 1c         | WT-Gt   | WT-S365A | WT-ΔCTT | <0.0001  | <0.0001  | <0.0001  |         |          | 0.0383  | 0.0133   | 0.0475  | Suppl 5  | WT-Gt    |          |                    |             |                    |
| c-di-GMP   | <0.0001 | <0.0001  | <0.0001 |          |          |          |         | 4h       | WT-Gt   | WT-S365A | WT-ΔCTT | 5c       | 0.0241   |          |                    |             |                    |
| 2'3' cGAMP | <0.0001 | <0.0001  | <0.0001 | 3g       | WT-Gt    | WT-S365A | WT-ΔCTT |          | 0.0204  | 0.0105   | 0.0094  |          |          |          |                    |             |                    |
| dsDNA      | <0.0001 | <0.0001  | <0.0001 | <0.0001  | <0.0001  | <0.0001  |         | 4i       | WT-Gt   | WT-S365A | WT-ΔCTT |          |          |          |                    |             |                    |
| 1d         | WT-Gt   | WT-S365A | WT-ΔCTT |          |          |          |         |          | 0.02768 | 0.02641  | 0.02641 | Suppl 6  |          |          |                    |             |                    |
|            | <0.0001 | <0.0001  | <0.0001 |          |          |          |         |          |         |          |         | 6a       | WT-Gt    | Gt-S365A | Gt-Irf3-/-         | Gt-Tnfr1-/- |                    |
|            |         |          |         | Suppl 3  |          |          |         |          |         |          |         | 0.0115   | 0.0020   | 0.0052   | 0.0106             |             |                    |
|            |         |          |         | 3b       | WT-Gt    | WT-S365A | WT-ΔCTT |          |         |          |         | 6b       | < 0.0001 |          |                    |             |                    |
|            |         |          |         | 0.0054   | < 0.0001 | < 0.0001 |         |          |         |          |         | 6c       | 0.0143   |          |                    |             |                    |
| Suppl 2    |         |          |         | 3c       | WT-Gt    | WT-S365A | WT-ΔCTT |          |         |          |         | 6d       | 0.0206   |          |                    |             |                    |
| 2d         | 0.0393  |          |         | < 0.0001 | < 0.0001 | < 0.0001 |         | Suppl 4  |         |          |         |          |          |          |                    |             |                    |
|            |         |          |         | 3d       | WT-Gt    | WT-S365A | WT-ΔCTT | 4b       | WT-Gt   | WT-S365A | WT-ΔCTT |          |          |          |                    |             |                    |
|            |         |          |         | <0.0001  | <0.0001  | <0.0001  |         |          | 0.0335  | 0.0488   | 0.027   |          |          |          |                    |             |                    |

Table 1: P values for corresponding figures.
